# Supplementary material for: Clinical Characteristics and Prognostic Impact of HER2-Ultralow Breast Cancer and Tumor-Infiltrating Lymphocytes (TILs)
Source: Research Square preprint supplement (doi:10.21203/rs.3.rs-6741803/v1), 2025-06-23
Supplement: Supplementary file 1 [file 2145c2fad511101324eb3a8e.docx]

**Table 1.** **Clinicopathological features of 244 patients who were treated with preoperative chemotherapy**

| Parameters (*n* = **244**) | Number of patients (%) |
| --- | --- |
| Age (years old) | 55 (24–76) |
| Tumor size (mm) | 30.3 (9.2 – 119.8) |
| Skin infiltration  Negative / Positive | 201 (82.4%) / 43 (17.6%) |
| Lymph node metastasis  Negative / Positive | 70 (40.7%) / 102 (59.3%) |
| Estrogen receptor  Negative / Positive | 131 (53.7%) / 113 (46.3%) |
| Progesterone receptor  Negative / Positive | 181 (74.2%) / 63 (25.8%) |
| HER2-expressing  HER2-zero / HER2-low  HER2-null / HER2-ultralow / IHC 1+ / IHC 2+ and ISH- | 144 (59.0%) / 100 (41.0%)  56 (23.0%) / 88 (36.1%) / 65 (26.6%) / 35 (14.3%) |
| Ki67  Low / High | 82 (33.6%) / 162 (66.4%) |
| Pathological response  Non-pCR / pCR | 176 (72.1%) / 68 (27.9%) |
| Tumor- infiltrating lymphocytes  Low / High | 147 (60.2%) / 97 (39.8%) |

HER: human epidermal growth factor receptor. IHC: immunohistochemistry. ISH: in situ hybridization. CR: complete response.

**Table 2. Comparison of Clinicopathological features by HER2-expressing for HER2-negative breast cancer.**

| Parameters | HER2-negative (*n* = 244) | | *p* value | HER2-zero (*n* = 144) | | *p* value |
| --- | --- | --- | --- | --- | --- | --- |
| HER2-null (*n* = 56) | Not HER2-null (*n* = 188) | HER2-null (*n* = 56) | HER2-ultralow (*n* = 88) |
| Age (years old)  ≤ 60  > 60 | 48 (85.7%)  8 (14.3%) | 123 (65.4%)  65 (34.6%) | 0.004 | 48 (85.7%)  8 (14.3%) | 60 (68.2%)  28 (31.8%) | 0.018 |
| Tumor size (mm)  ≤ 20  > 20 | 6 (10.7%)  50 (89.3%) | 31 (16.5%)  157 (83.5%) | 0.290 | 6 (10.7%)  50 (89.3%) | 17 (19.3%)  71 (80.7%) | 0.169 |
| Skin infiltration  Negative  Positive | 48 (85.7%)  8 (14.3%) | 153 (81.4%)  35 (18.6%) | 0.455 | 48 (85.7%)  8 (14.3%) | 73 (83.0%)  15 (17.0%) | 0.659 |
| Lymph node status  Negative  Positive | 13 (23.2%)  43 (76.8%) | 57 (30.3%)  131 (69.7%) | 0.302 | 13 (23.2%)  43 (76.8%) | 23 (26.1%)  65 (73.9%) | 0.693 |
| Estrogen receptor  Negative  Positive | 42 (75.0%)  14 (25.0%) | 89 (47.3%)  99 (52.7%) | <0.001 | 42 (75.0%)  14 (25.0%) | 42 (47.7%)  46 (52.3%) | 0.001 |
| Progesterone receptor  Negative  Positive | 47 (83.9%)  9 (16.1%) | 134 (71.3%)  54 (28.7%) | 0.058 | 47 (83.9%)  9 (16.1%) | 61 (69.3%)  27 (30.7%) | 0.048 |
| Ki67  Low  High | 16 (28.6%)  40 (71.4%) | 66 (35.1%)  122 (64.9%) | 0.363 | 16 (28.6%)  40 (71.4%) | 34 (38.6%)  54 (61.4%) | 0.216 |
| Pathological response  Non-pCR  pCR | 40 (71.4%)  16 (28.6%) | 136 (72.3%)  52 (27.7%) | 0.894 | 40 (71.4%)  16 (28.6%) | 64 (72.7%)  24 (27.3%) | 0.865 |
| Tumor- infiltrating lymphocytes  Low  High | 26 (46.4%)  30 (53.6%) | 121 (64.4%)  67 (35.6%) | 0.016 | 26 (46.4%)  30 (53.6%) | 58 (65.9%)  30 (34.1%) | 0.021 |

HER: human epidermal growth factor receptor. CR: complete response.

**Table 3.** **Univariate and multivariate analysis with respect to disease-free survival and overall survival for HER2-negative breast cancer.**

| Parameters | Disease-free survival | | | | | | |  | Overall survival | | | | | | |
| --- | --- | --- | --- | --- | --- | --- | --- | --- | --- | --- | --- | --- | --- | --- | --- |
| Univarite analysis | | |  | Multivariate analysis | | | Univarite analysis | | |  | Multivariate analysis | | |
| HR | 95% CI | *p* value |  | HR | 95% CI | *p* value |  | HR | 95% CI | *p* value |  | HR | 95% CI | *p* value |
| Age at opetation (yr)  ≤ 60 vs > 60 | 1.259 | 0.806-1.968 | 0.311 |  |  |  |  | 1.001 | 0.524-1.914 | 0.997 |  |  |  |  |
| Tumor size (mm)  ≤ 20.0 vs > 20.0 | 1.702 | 0.881-3.288 | 0.113 |  |  |  |  | 1.198 | 0.506-2.835 | 0.681 |  |  |  |  |
| Skin infiltration  Negative vs Positive | 1.954 | 1.183-3.227 | 0.009 |  | 1.865 | 1.125-3.092 | 0.016 | 2.971 | 1.587-5.563 | <0.001 |  | 2.797 | 1.469-5.323 | 0.002 |
| Lymph node status  Negative vs Positive | 1.393 | 9.826-2.350 | 0.214 |  |  |  |  | 2.172 | 0.966-4.883 | 0.061 |  | 1.741 | 0.769-3.942 | 0.184 |
| Estrogen receptor  Negative vs Positive | 0.796 | 0.521-1.215 | 0.290 |  |  |  |  | 0.619 | 0.335-1.143 | 0.125 |  |  |  |  |
| Progesterone receptor  Negative vs Positive | 0.502 | 0.292-0.864 | 0.013 |  | 0.397 | 0.231-0.682 | <0.001 | 0.554 | 0.257-1.193 | 0.131 |  |  |  |  |
| HER2-expressing  Null vs Not-null | 0.739 | 0.465-1.174 | 0.200 |  |  |  |  | 0.505 | 0.273-0.933 | 0.029 |  | 0.454 | 0.242-0.848 | 0.013 |
| Ki67  Low vs High | 1.425 | 0.910-2.231 | 0.122 |  |  |  |  | 1.676 | 0.847-3.320 | 0.138 |  |  |  |  |
| Pathological response  Non-pCR vs pCR | 0.418 | 0.236-0.739 | 0.003 |  | 0.366 | 0.205-0.655 | <0.001 | 0.447 | 0.199-1.003 | 0.051 |  | 0.508 | 0.224-1.151 | 0.105 |
| Tumor- infiltrating lymphocytes  Low vs High | 0.800 | 0.513-1.247 | 0.324 |  |  |  |  | 0.662 | 0.351-1.250 | 0.204 |  |  |  |  |

HER: human epidermal growth factor receptor. HR: hazard ratio. CI: confidence intervals. pCR: pathological complete response.
